# Supplementary material
Source: Frontiers journal article supplement (https://www.frontiersin.org/articles/525567)

## *Supplementary Material*

**Supplementary Figure 1** – Blank version of the seismic reflection profiles of Figure 5

| Units | ID | Geologic description and seismo-stratigraphic facies                                                                                                                                                                                                                                                   | Age                       | Pattern                                                                               |
|-------|----|--------------------------------------------------------------------------------------------------------------------------------------------------------------------------------------------------------------------------------------------------------------------------------------------------------|---------------------------|---------------------------------------------------------------------------------------|
|       | U1 | Unconsolidated siliciclastic turbiditic and distal deposits often associated with chaotic bodies at the base of the succession. Analog of units PP and Q of Figure 1.<br>Well-layered HF-LA reflectors with the presence of numerous unconformities.                                                   | Pliocene - Holocene       |    |
|       | U2 | Salt-bearing complex related to the tectonic stacking of Messinian evaporites.<br>HA and quite continuous reflectors at the top, overlying a highly homogeneous reflection-free zone bounded at the base by a planar HA reflector.                                                                     | Messinian                 |    |
|       | U3 | Siliciclastic deposits (analog of outcropping units in Sicily and Southern Apennines) marked by on-lap on U4.<br>Alternating HA-LF, subparallel reflectors, bounded at the top by a continuous HA reflector; this unit can be differentiated from the accretionary wedge only in the external regions. | Paleocene (?) - Tortonian |  |
|       | U4 | Pelagic carbonate sediments (analog of outcropping units in Sicily and Southern Apennines, AMU unit in Figure 1), covering the Ionian oceanic crust.<br>LA-LF subparallel reflectors characterized at the base by high-amplitude reflectors 0.3 s TWT thick.                                           | Triassic - Cretaceous     |  |
|       | U5 | Noisy seismic facies located under HA-LF seismic reflections at 8.5 s TWT in the external area of the accretionary wedge.                                                                                                                                                                              |                           |  |

- 
- U6 Calabrian Accretionary Wedge made up by the tectonic stacking of U3, U4 (AMU unit in Figure 1), and of the Calabride units (KPU in Figure 1).  
Chaotic and highly deformed LA seismic facies with some LF-HA discontinuous reflectors.
- Mesozoic - Pliocene

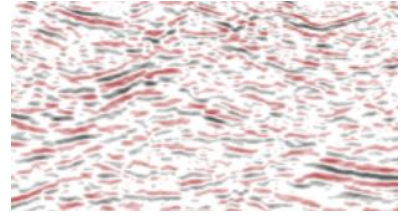

- U9 Hyblean platform carbonates. Analogue of HU unit in Figure 1.  
Layered HF seismic facies in the upper part; transparent seismic facies in the lower part.
- Mesozoic - Miocene

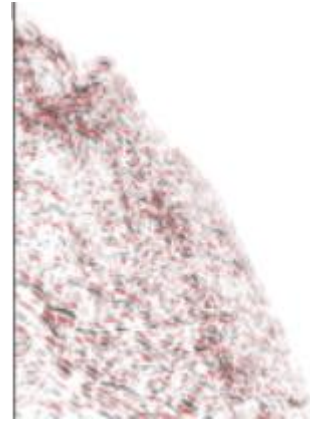

---

Notes:

HA = high amplitude; LA = low amplitude; HF = high frequency; LF = low frequency.

---

**Supplementary Figure 2** – Uninterpreted version of the seismic reflection profiles of Figure 5

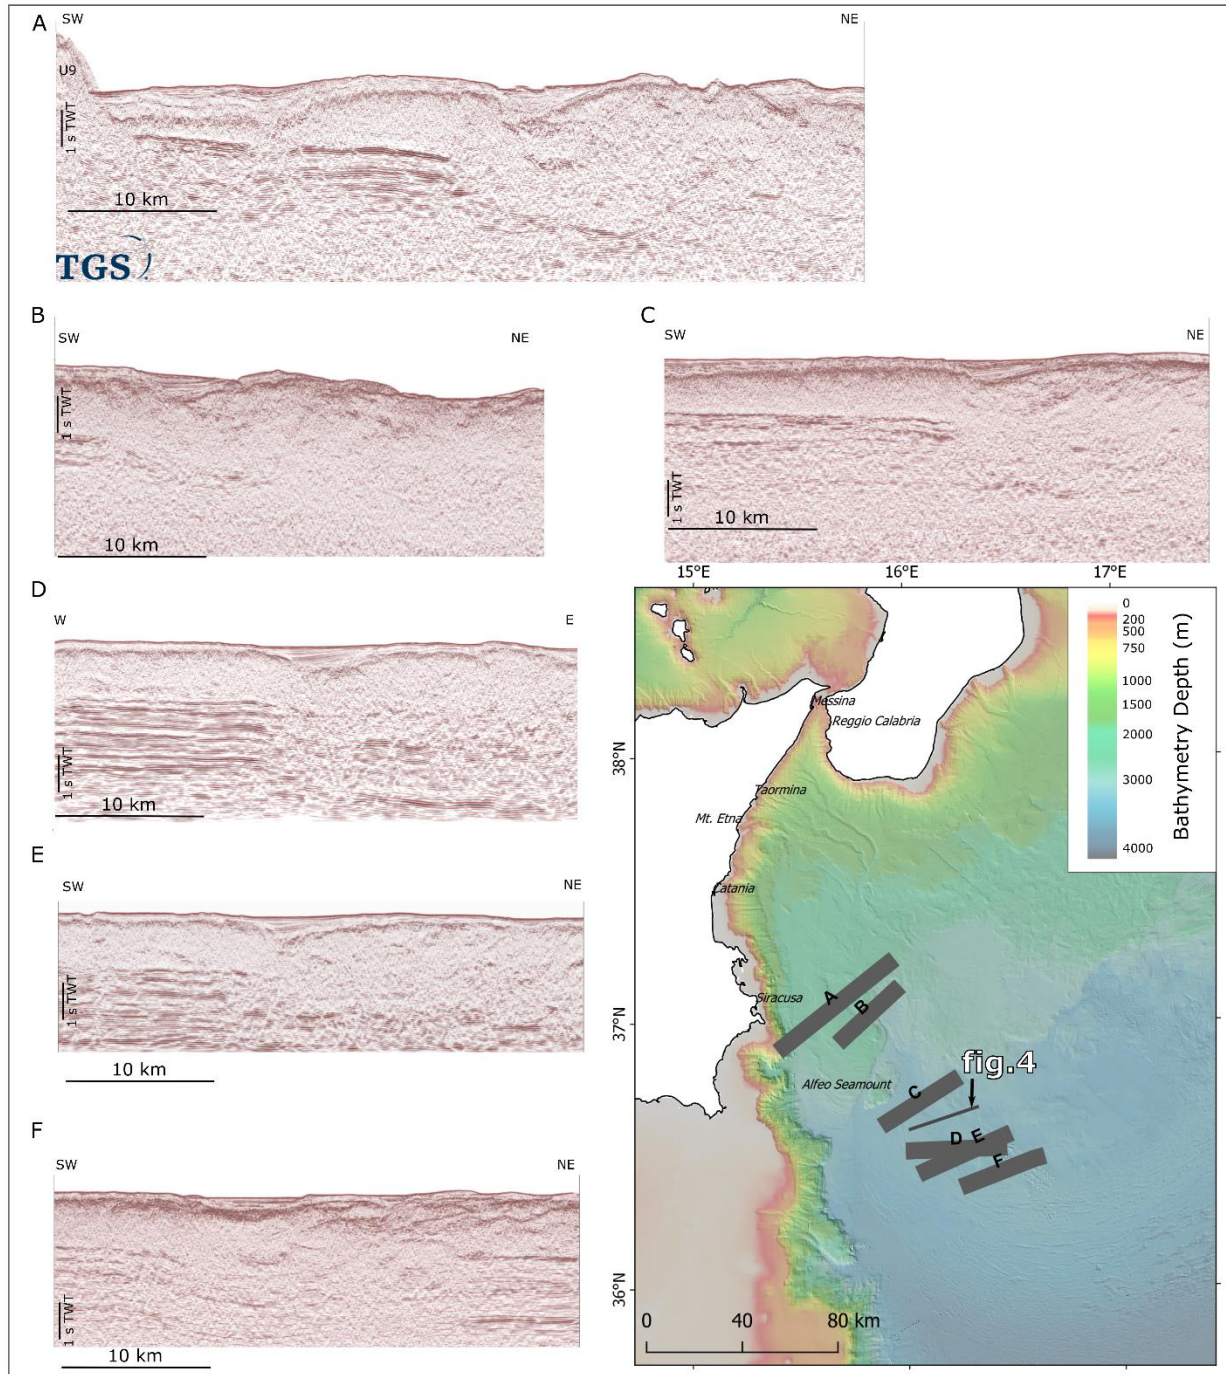

Supplement: Image_1.PDF [file Image_1.PDF]
